# Supplementary material for: PyLDM - An open source package for lifetime density analysis of time-resolved spectroscopic data
Source: PubMed Central journal article supplement (PMC5460884; doi:10.1371/journal.pcbi.1005528), 2017-05-22
Supplement: pcbi.1005528.s004.pdf [file pcbi.1005528.s004.pdf]

## S1 Appendix

The ordinary least squares solution, as mentioned for Tikhonov regularization, is:

$$\hat{x}_\lambda^{OLS} = (D^T D)^{-1} D^T A_\lambda$$

In the case where D is orthogonal, then  $D^T = D^{-1}$ , and this simply becomes:

$$\hat{x}_\lambda^{OLS} = D^T A_\lambda \quad (1)$$

Note also that the LASSO minimization problem can be written in expanded form as (note that the vector signs have been removed from x for clarity):

$$\min_x x_\lambda^T D^T D x_\lambda - x_\lambda^T D^T A_\lambda - A_\lambda^T D x_\lambda + A_\lambda^T A_\lambda + \alpha \|Lx\|_1$$

which simplifies to:

$$\min_x x_\lambda^T x_\lambda - x_\lambda^T D^T A_\lambda - A_\lambda^T D x_\lambda + A_\lambda^T A_\lambda + \alpha \|Lx\|_1 \quad (2)$$

Note that,

$$A_\lambda^T = (x_\lambda^{OLS})^T D^T$$

Using this result and  $A_\lambda = D \hat{x}_\lambda^{OLS}$  we arrive at

$$\min_x x_\lambda^T x_\lambda - x_\lambda^T x_\lambda^{OLS} - (x_\lambda^{OLS})^T x_\lambda + \alpha \|Lx\|_1$$

Which for a single entry  $j$ , using  $L = I$ , can be written as

$$\min_x x_j^2 - 2x_j^{OLS} x_j + \alpha |x_j| = \min_x O(x) \quad (3)$$

with  $O$  simply being the objective function.

This can be split into two scenarios:

1.  $x_j^{OLS} \geq 0$ : This means that  $x_j \geq 0$  because if it were negative,  $O(x)$  in (3) could be lowered by making it positive. Now differentiating  $O$  w.r.t  $x_j$  and setting to zero we get:

$$x_j = 2x_j^{OLS} - \alpha \quad (4)$$

However, as  $x_j \geq 0$ , then  $(2x_j^{OLS} - \alpha) \geq 0$ , so we arrive at:

$$x_j = (2x_j^{OLS} - \alpha)^+ = \text{sgn}(x_j^{OLS})(2|x_j^{OLS}| - \alpha)^+ \quad (5)$$

2.  $x_j^{OLS} \leq 0$ : Using the same reasoning this implies that  $x_j < 0$ , and differentiating will result in the same answer.

Note that the result will hold for  $L \neq I$ , however, the value of alpha will be multiplied by some function  $f(L, x_{i \neq j})$
